# Supplementary material
Source: JCI journal article supplement (doi:10.1172/jci183392)

Fig 1E

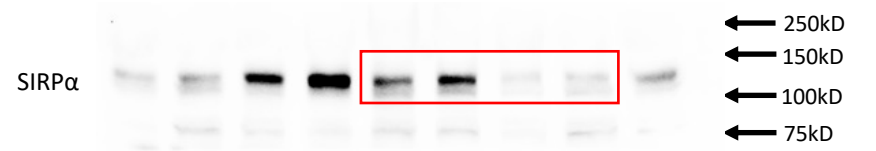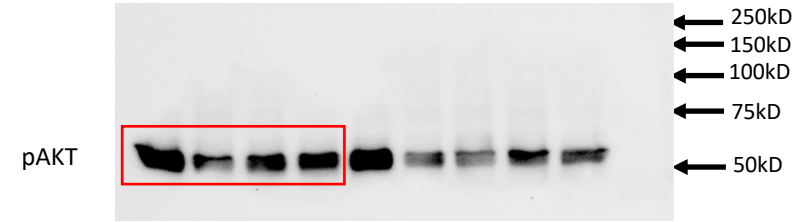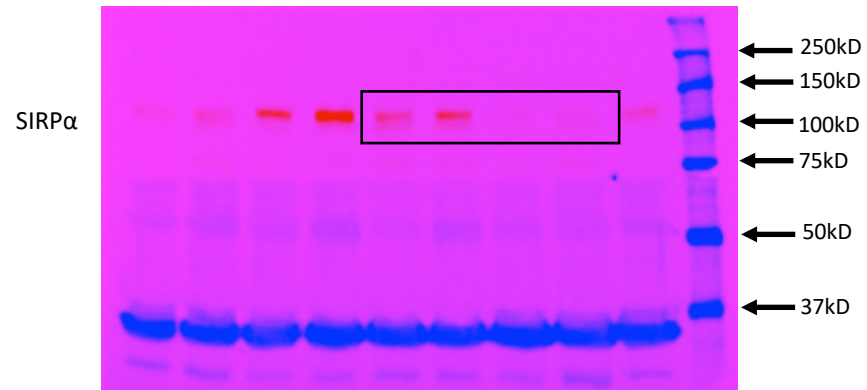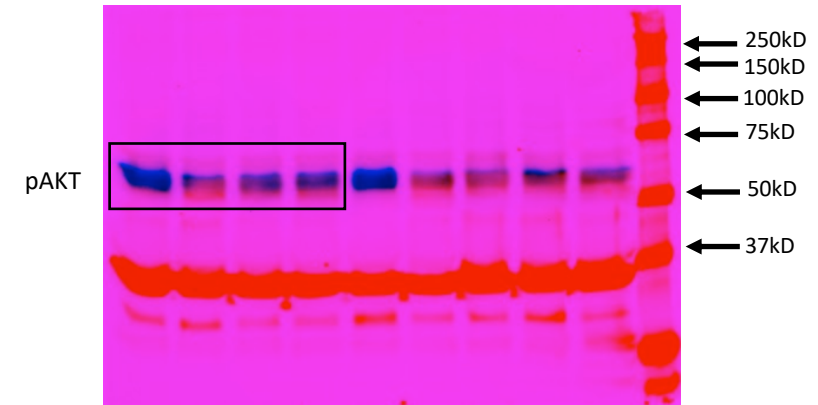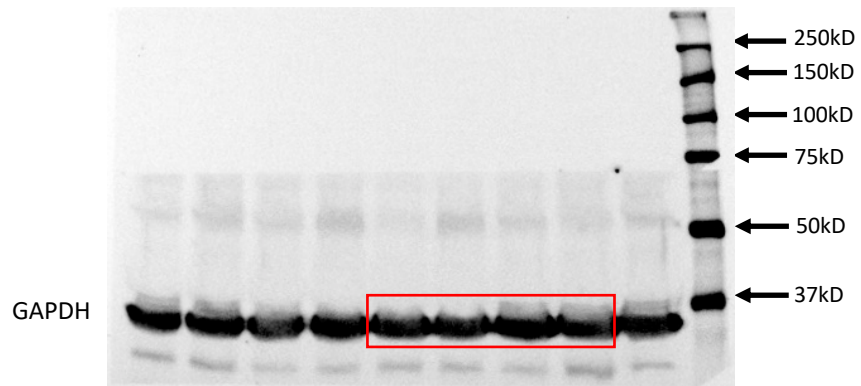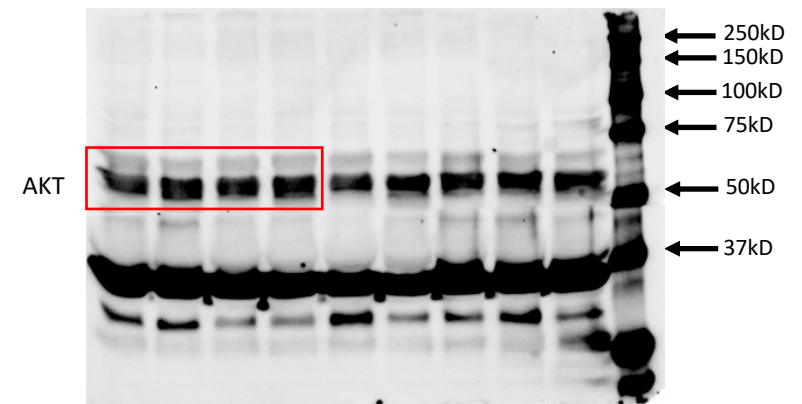

Fig 1F

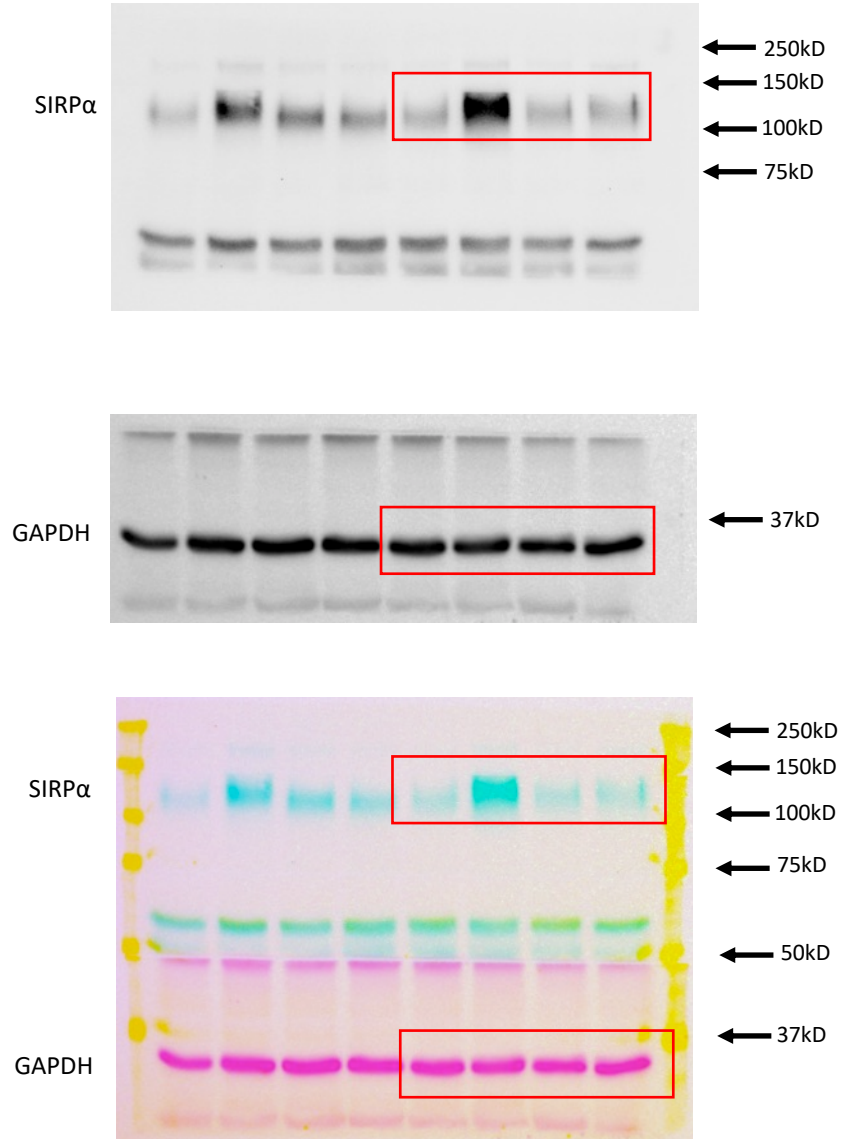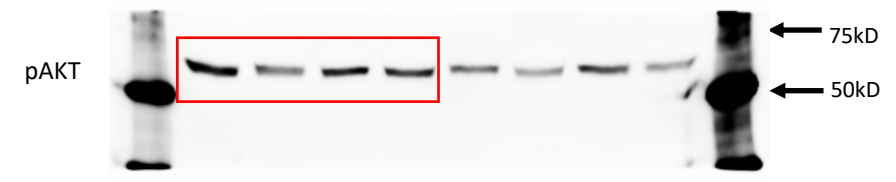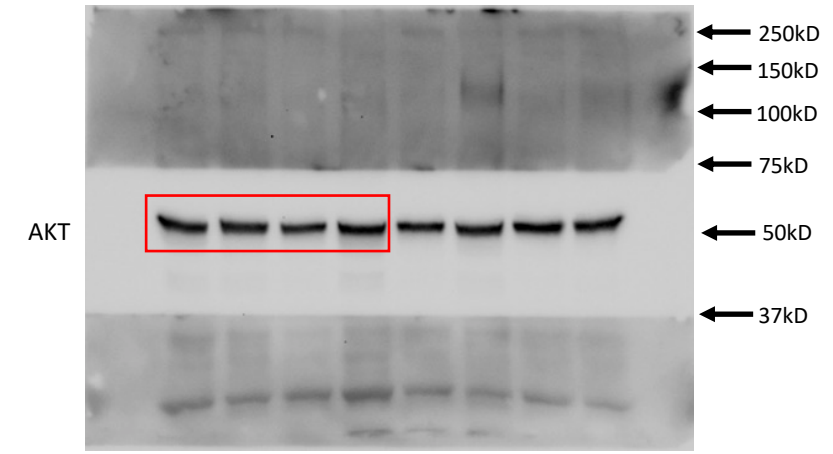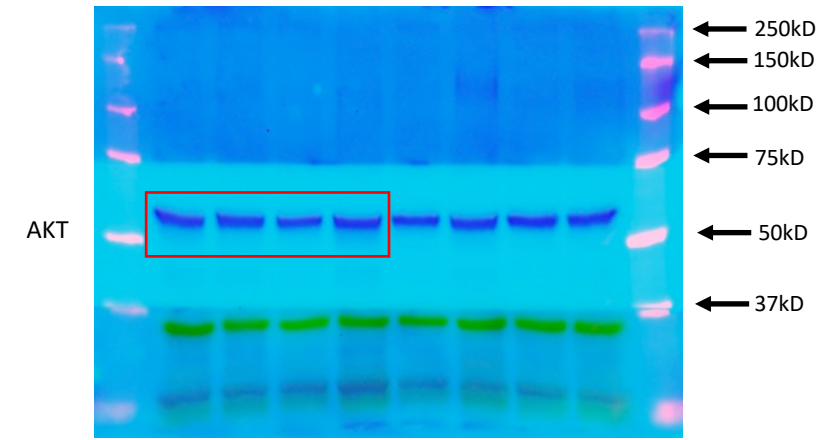

Fig 2B

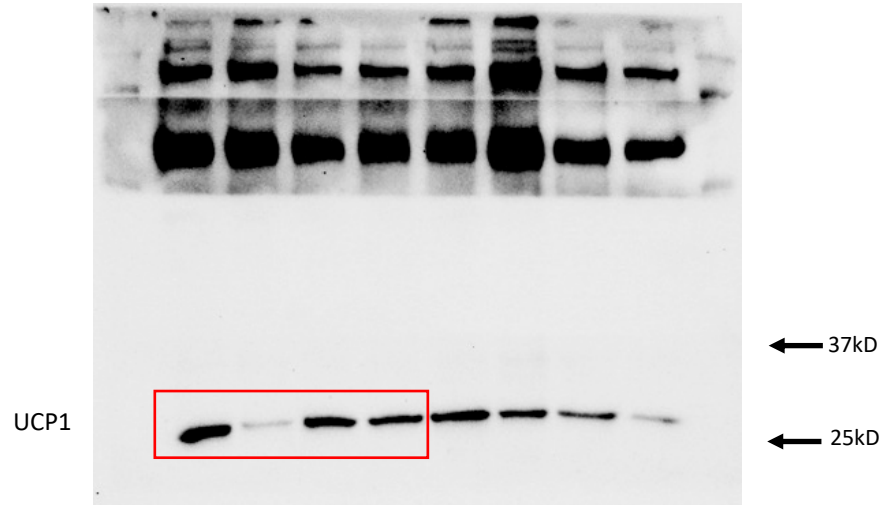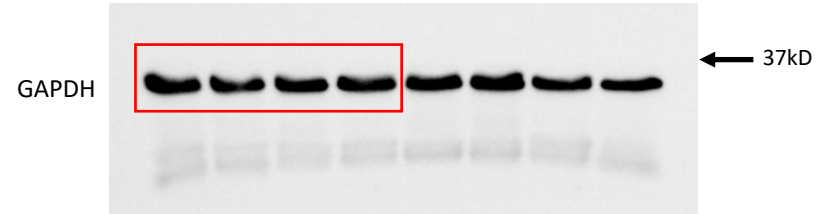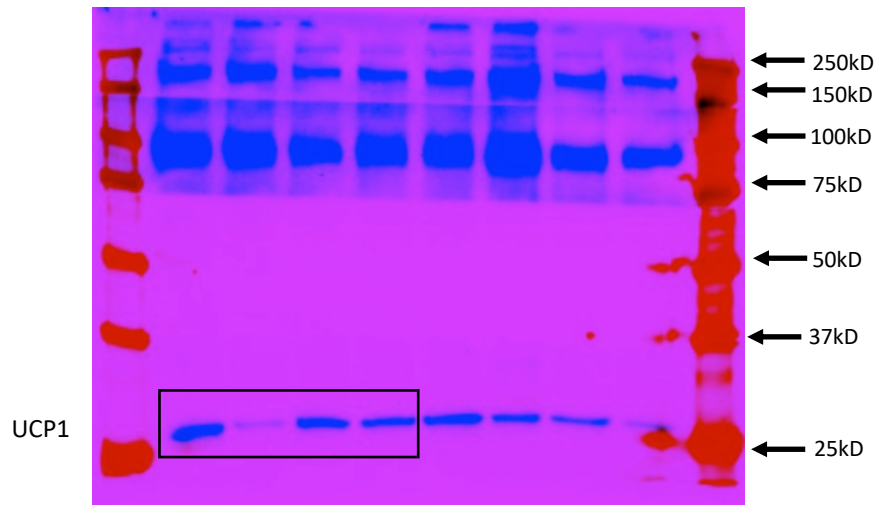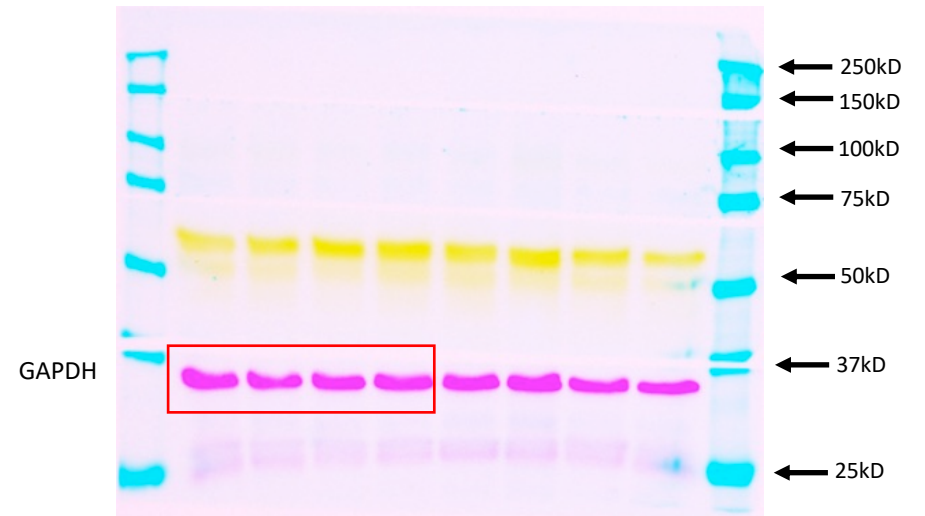

Fig 2E

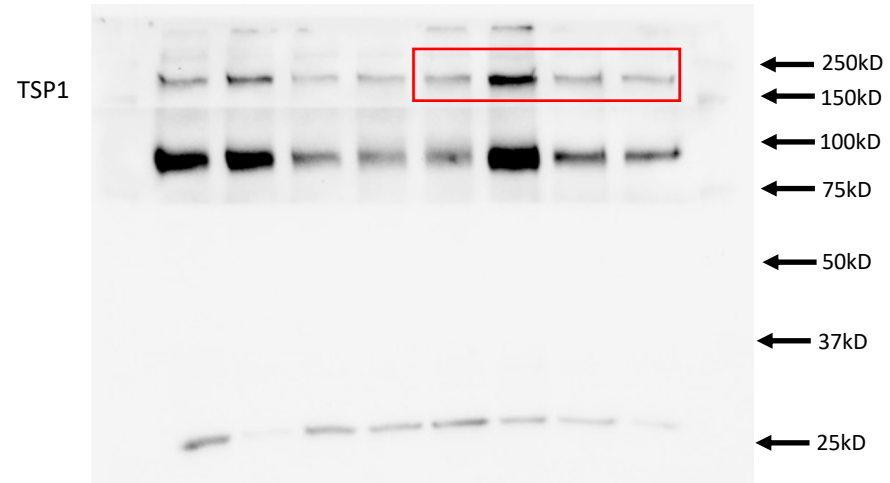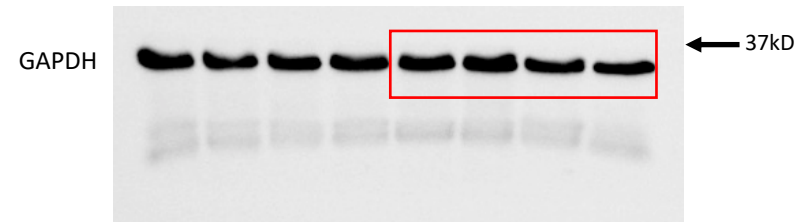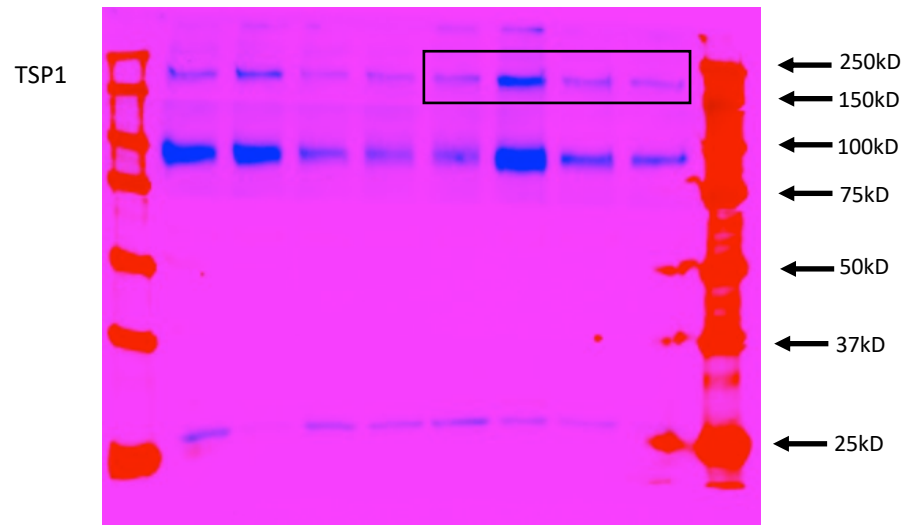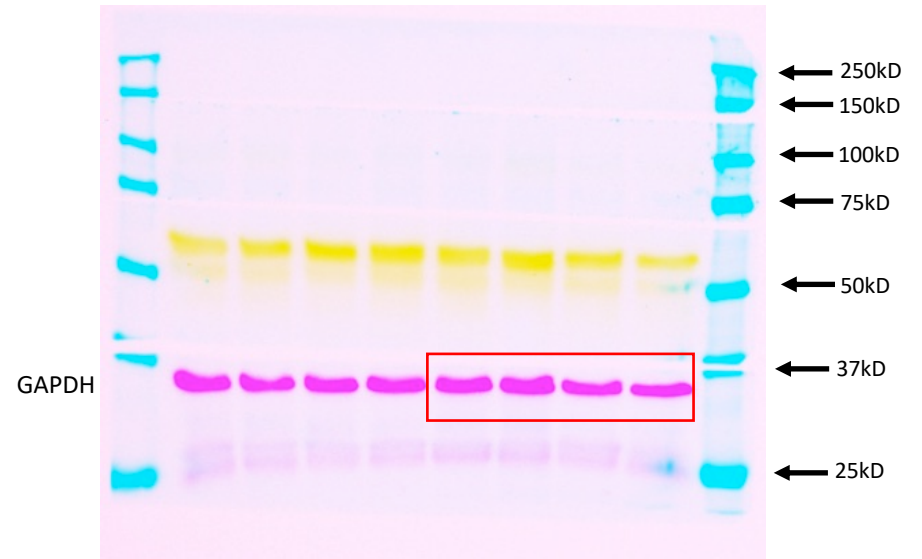

Fig 4H

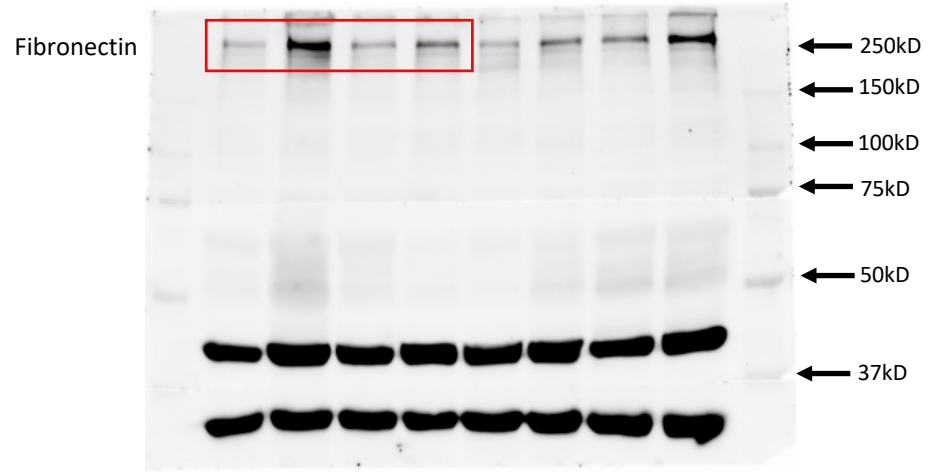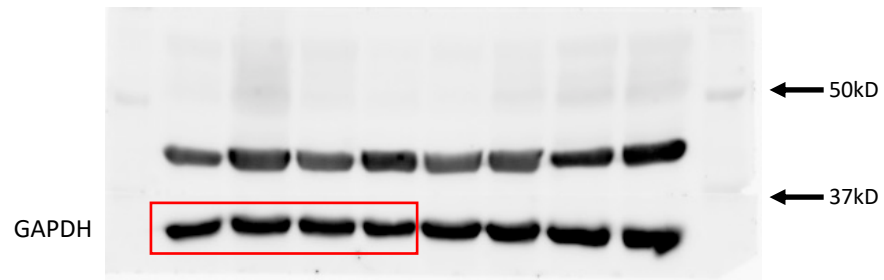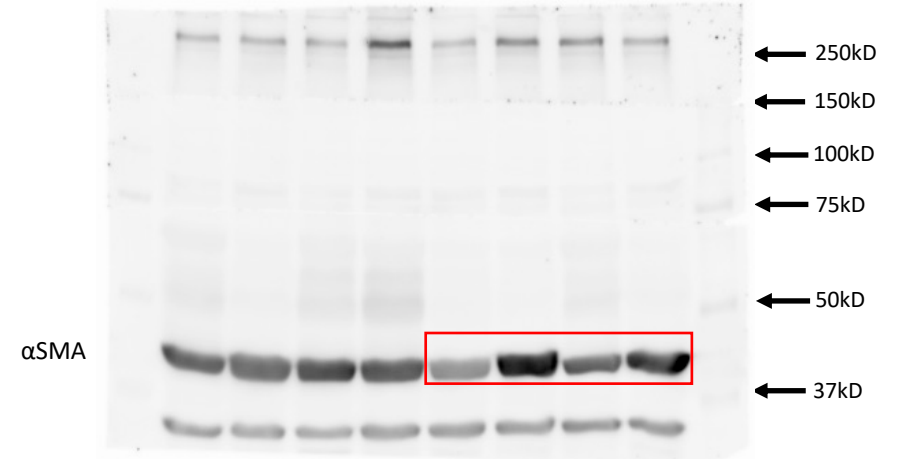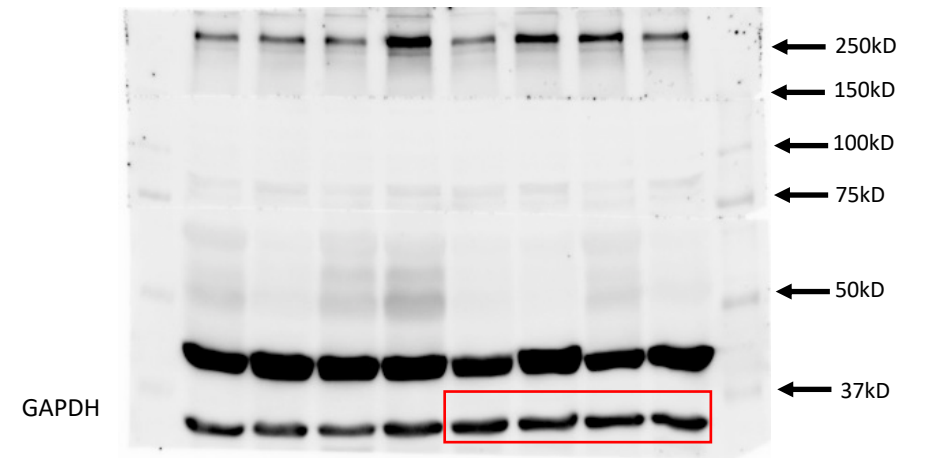

Fig 4K

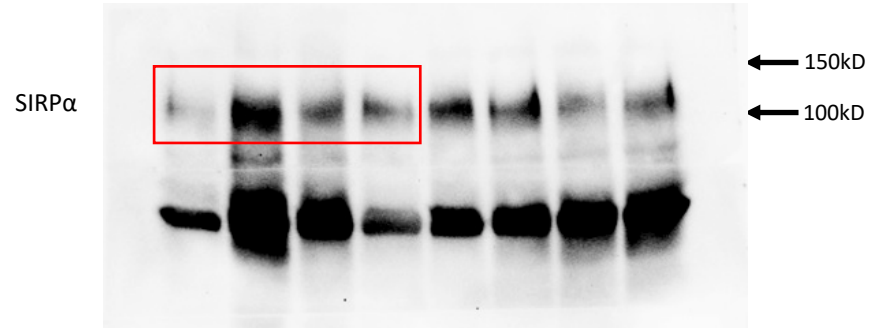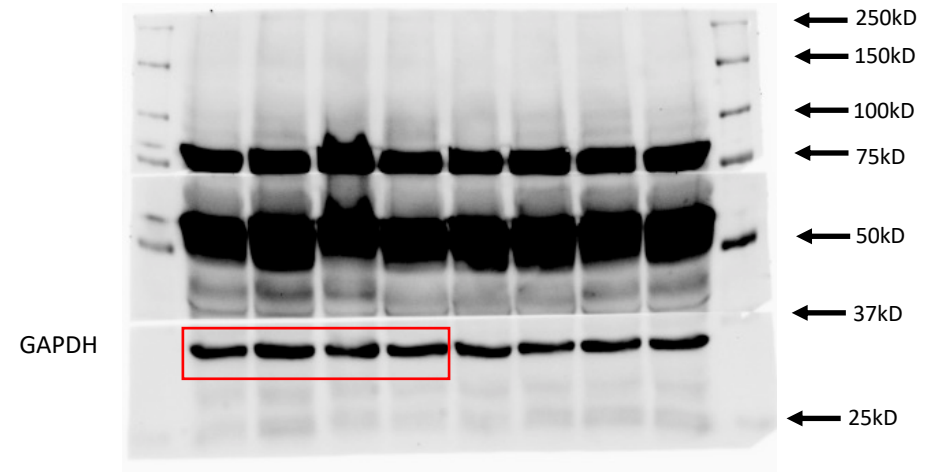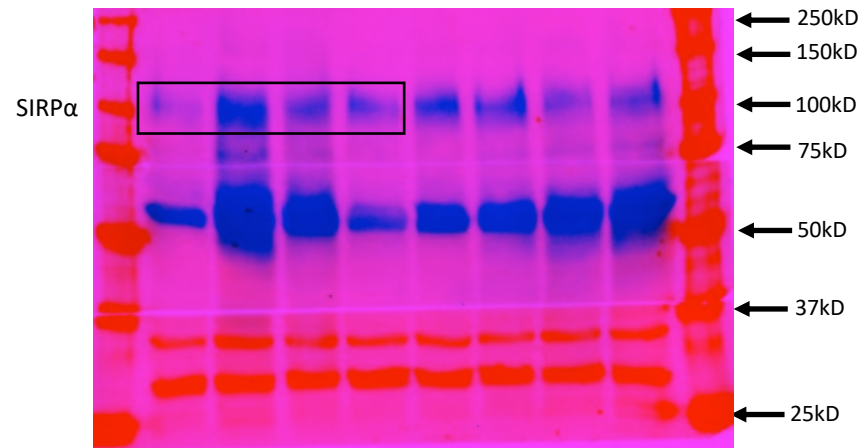

**Fig S1A**

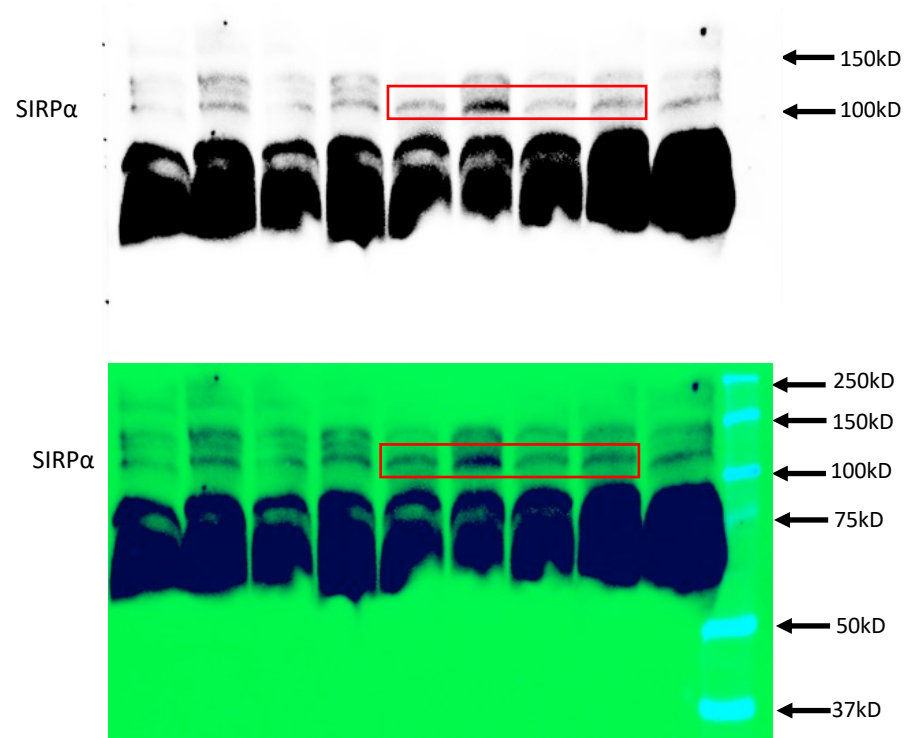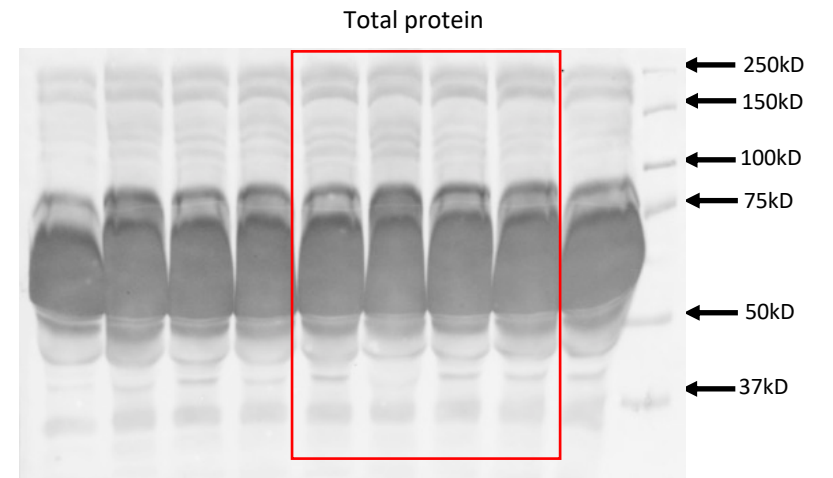

Fig S5D

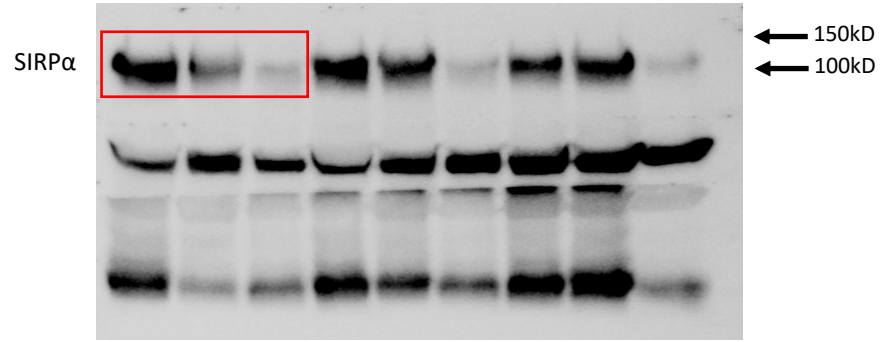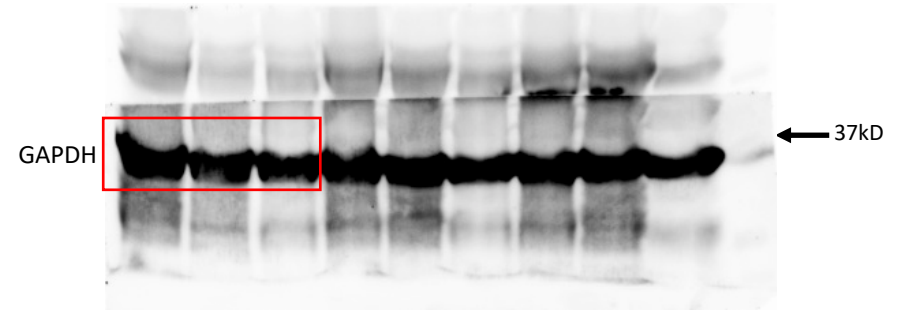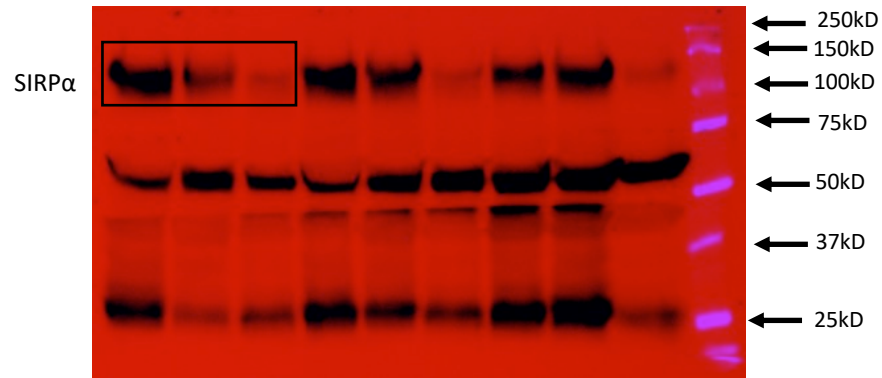

Fig S5E

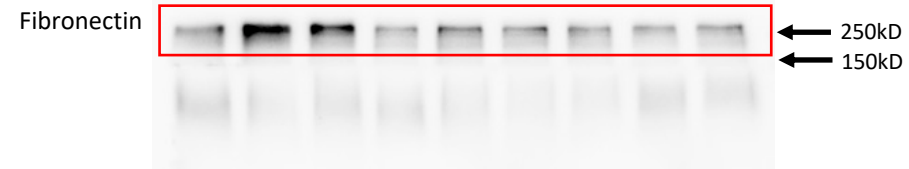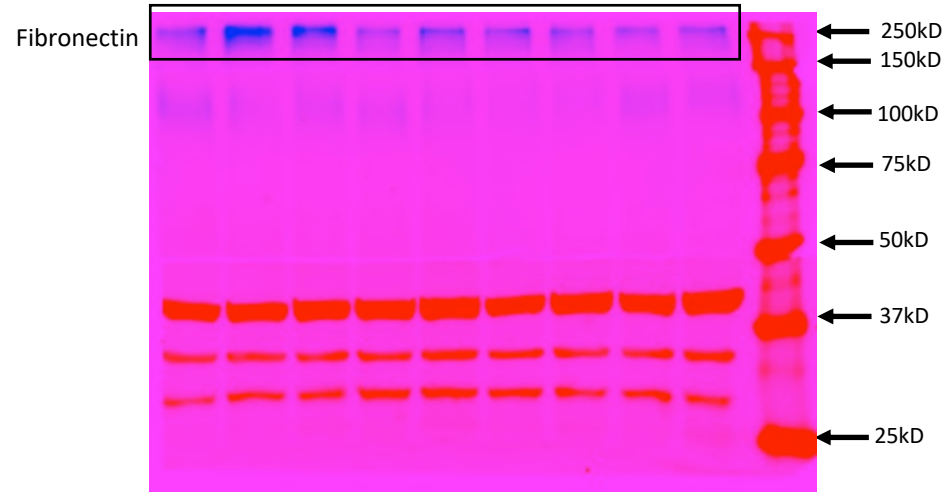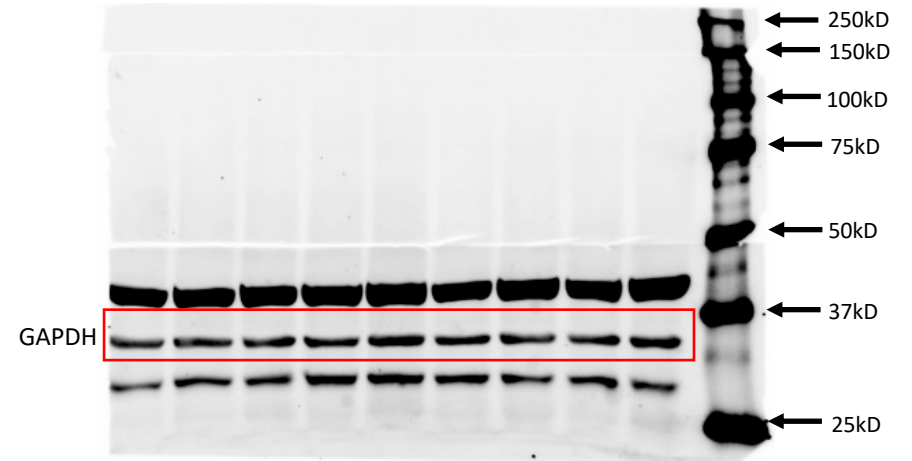

Supplement: sd2 [file 2]
